# Supplementary material for: Unexpected Implication of SRP and AGO2 in Parkinson’s Disease: Involvement in Alpha-Synuclein Biogenesis
Source: MDPI journal article supplement (doi:10.3390/cells10102792), 2021-10-18
Supplement: s1 [file s1]

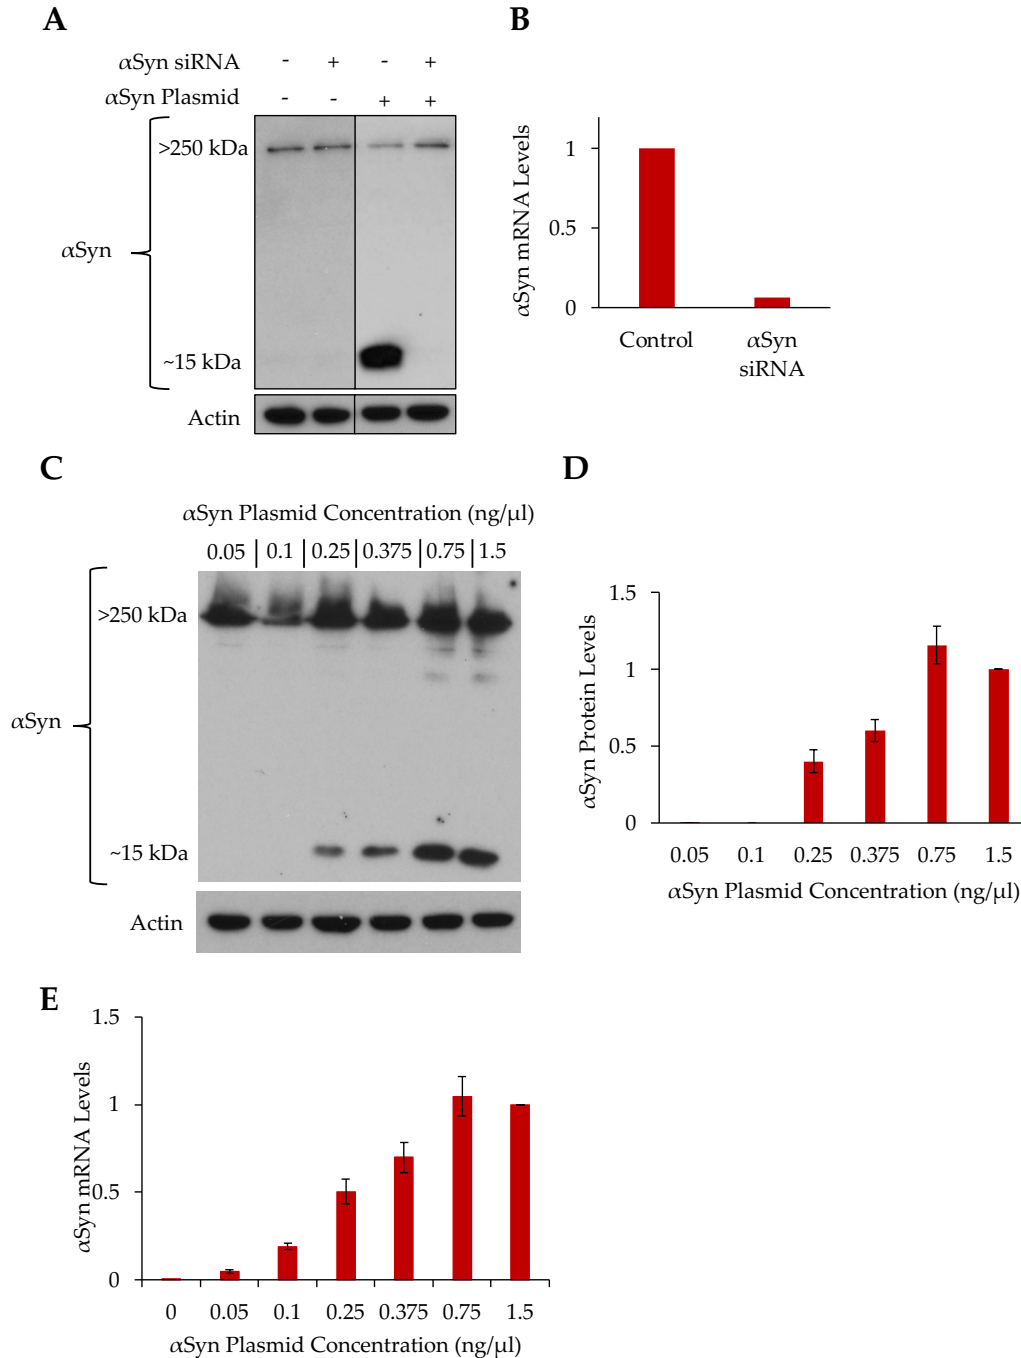

**Supplementary Figure S1.** Expression of Recombinant αSyn in Tet-On Cells. (A) Western blot of αSyn protein (with or without recombinant αSyn) following knockdown with αSyn specific siRNA. 15 kDa band is the monomer, >250 kDa band is nonspecific. αSyn plasmid is pCS2-SNCA. beta-Actin detected by western blot is a loading control. (B) RT-qPCR analysis of mRNA levels of recombinant αSyn in the cells treated with αSyn specific siRNA and in the control cells. (C) Western blot of αSyn protein following transfection with increasing concentration of the pCS2-SNCA plasmid (0.05-1.5 ng/μl). (D) Quantification of western blots using ImageJ. Normalized to beta-Actin protein levels and then to αSyn protein levels at 1.5 ng/μl concentration. Graph shows mean values ± SE with a total of n= 3 independent experiments. (E) RT-qPCR analysis of αSyn mRNA levels following transfection with increasing concentration of the pCS2-SNCA plasmid (0-1.5 ng/μl). Normalized to beta-Actin mRNA levels and then to αSyn mRNA levels at 1.5 ng/μl concentration. Graph shows mean values ± SE with a total of n= 3 independent experiments.

A

MDVFMKGLSK AKEGVVAAE KTKQGVAAE GKTKEGVLYV GSKTKEGVVH  
 GVATVAEKT EQVTNVGGAV VTGVTAVAQK TVEGAGSIAA ATGFVKKDQL  
 GKNEEGAPQE GILEDMPVDP DNEAYEMPSE EGYQDYEP

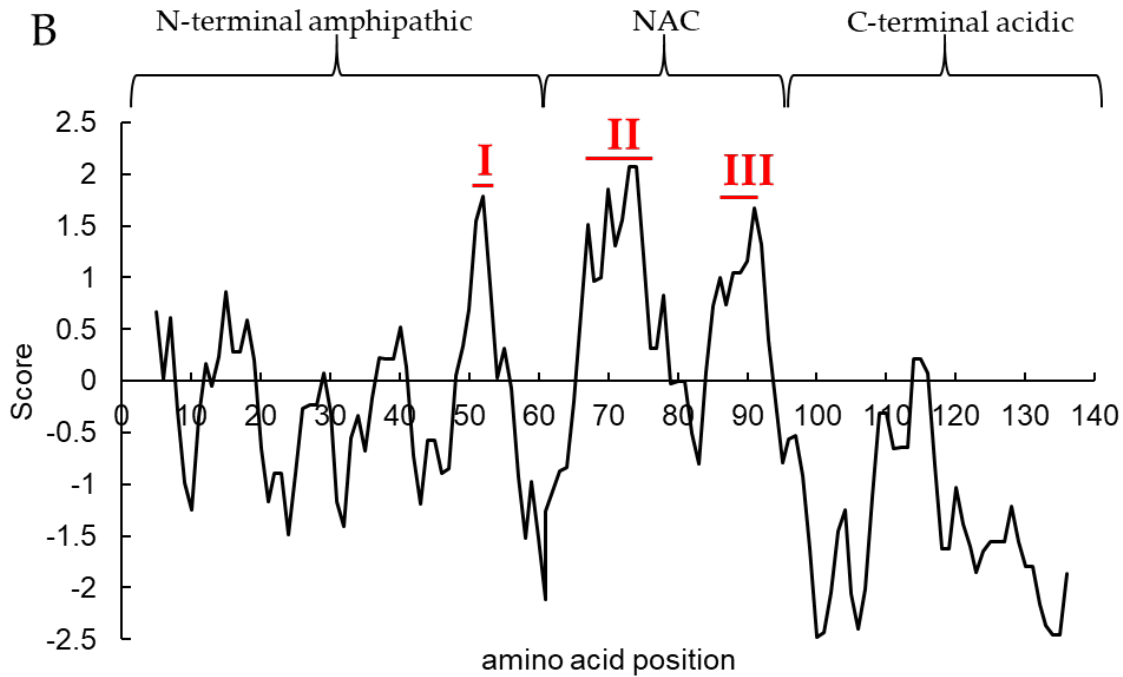

C

| Site<br>(as labeled on<br>panel B) | Amino acid<br>Position | Amino acid<br>sequence | GRAVY<br>value |
|------------------------------------|------------------------|------------------------|----------------|
| I                                  | 51-52                  | GV                     | 1.9            |
| II                                 | 69-75                  | AVVTGVT                | 1.8            |
| III                                | 88-92                  | IAAAT                  | 1.84           |

**Supplementary Figure S2.** Hydrophobic Domains of  $\alpha$ Syn Protein. (A) Amino acid composition of  $\alpha$ Syn. (B) Kyte-Doolittle hydropathy plot of full length  $\alpha$ Syn. Hydrophobicity score was calculated using <https://web.expasy.org/protscale/>. Domains with positive hydrophobic score are labeled as I, II and III.  $\alpha$ Syn structural domains are amphipathic (1-60), non-amyloid beta component, NAC (61-95) and acidic domain (96-140 amino acids). (C) GRAVY values of selected hydrophobic domains. Average hydropathy value of possible interacting domains were calculated using <http://www.gravy-calculator.de/>.

**Supplementary Table S1.** Sequences of siRNAs Used for Targeted Knockdown.

| siRNA                  | Target NM   | Sequence                      | Company   | Concentration Used (nM) |
|------------------------|-------------|-------------------------------|-----------|-------------------------|
| siSNCA ( $\alpha$ Syn) | NM_000345.3 | 5'-UGGCAACAGUGGCUGAGAA-3'     | Dharmacon | 11.25                   |
| siSRP54                | NM_003136.4 | 5'-GAAAUGAACAGGAGUCAAUdTdT-3' | Dharmacon | 13.75                   |
| siAGO2-1               | NM_012154   | 5'-GCACGGAAGUCCAUCUGAAUU-3'   | Dharmacon | 10                      |
| siAGO2-2               | NM_012154   | 5'-GCAGGACAAAGAUGUAUUAUU-3'   | Dharmacon | 10                      |
| siAGO2-3               | NM_012154   | 5'-GGGUCUGUGGUGAUAAAUAUU-3''  | Dharmacon | 10                      |
| siAGO2-4               | NM_012154   | 5'-GUAUGAGAACCCAAUGUCAUU-3'   | Dharmacon | 10                      |

**Supplementary Table S2.** Sequences of Primers Used for RT-qPCR Analysis.

| Target               | Target NM   | Forward                | Reverse                   |
|----------------------|-------------|------------------------|---------------------------|
| SNCA ( $\alpha$ Syn) | NM_000345.3 | TGCCTGTGGATCCTGACAAT   | TACGACTCACTATAGTTCTAGAGGC |
| SRP54                | NM_003136.4 | ACACCCGATCCTCTTGCTAC   | CAGTACGGATGGTGCCAAAG      |
| AGO2                 | NM_012154   | AGGACTTCAGATGGACTTCCG  | ACGGGCATCGAGATCAAGGT      |
| beta-Actin           | NM_001101.3 | CACCTTCTACAATGAGCTGCG  | TAGCACAGCCTGGATAGCAAC     |
| HPRT                 | NM_000194.3 | CTGAGGATTTGGAAAGGGTGTT | ATCTCCTTCATCACATCTCGAG    |
| GAPDH                | NM_002046   | GTCTCCTCTGACTTCAACAGCG | ACCACCCTGTTGCTGTAGCCAA    |
| OmpA                 |             | AACTACTGGAGCTGCCTCG    | GCACACACCATCGGCACTC       |

**Supplementary Table S3.** Demographic Characteristics of Substantia Nigra Samples

| Diagnosis | Age (Years) | Sex (M/F) | PMI (Hours) * |
|-----------|-------------|-----------|---------------|
| PD        | 78          | F         | 21            |
| PD        | 79          | M         | 19            |
| PD        | 88          | M         | 19            |
| PD        | 77          | M         | 11            |
| PD        | 82          | M         | 21            |
| PD        | 75          | M         | 6             |
| PD        | 79          | F         | 21            |
| Healthy   | 74          | M         | 16            |
| Healthy   | 38          | M         | 24            |
| Healthy   | 83          | F         | 18            |
| Healthy   | 89          | F         | 5             |
| Healthy   | 64          | M         | 14            |
| Healthy   | 87          | M         | 21            |

\* PMI is post-mortem interval
